# Supplementary material
Source: Springer Nature journal article supplement (https://www.springermedizin.de/resource/supplementary/12865_2013_577_MOESM2_ESM.pdf/9428270)

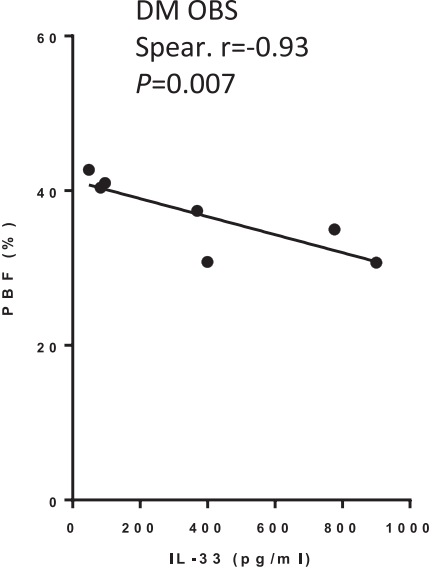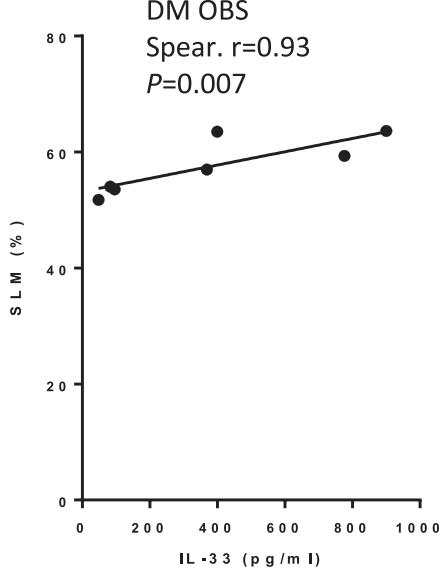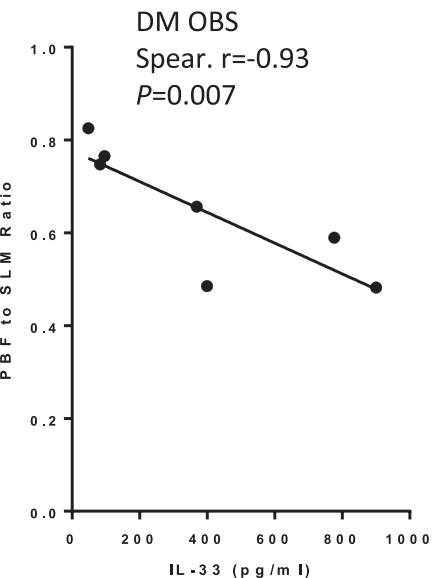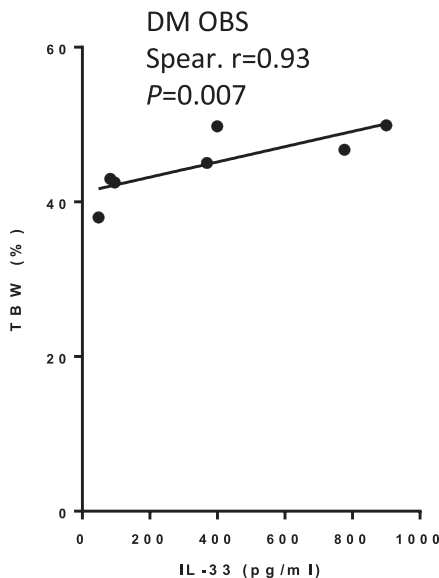

Supplement: MOESM2 [file 9428270]
